# Supplementary material for: Initial Phylotranscriptomic Confirmation of Homoplastic Evolution of the Conspicuous Coloration and Bufoniform Morphology of Pumpkin-Toadlets in the Genus Brachycephalus
Source: MDPI journal article supplement (doi:10.3390/toxins13110816), 2021-11-19
Supplement: s1 [file s1]

# Supplementary Materials: Initial Phylotranscriptomic Confirmation of Homoplastic Evolution of the Conspicuous Coloration and Bufoniform Morphology of Pumpkin-Toadlets in the Genus *Brachycephalus*

Mariana L. Lyra, Juliane P. C. Monteiro, Loïs Rancilhac, Iker Irisarri, Sven Künzel, Eugenia Sanchez, Thais H. Condez, Omar Rojas-Padilla, Mirco Solé, Luís Felipe Toledo, Célio F. B. Haddad and Miguel Vences

## Supplementary Methods

### *RNA extraction protocol:*

Tissues (20–100 mg) from each sample were homogenized in 2 mL tubes with steel beads in 1 mL TRIzol using the tissue lyser Precellys (speed 6000, 2× 55 sec in between 10 sec break). The samples were centrifuged for 10 min at 12,000 g at 4 °C. The solution was transferred to a new tube and incubated at room temperature (RT) for 5 min, after which 200 µL chloroform was added, samples were vortexed for 15 sec, incubated for 3 min at RT and centrifuged for 15 min at 12,000 g at 4 °C. The upper phase was transferred to a new tube and 500 µL isopropanol was added. The solution was incubated for 10 min at RT and centrifuged for 15 min at 12,000 g at 4 °C. The supernatant was removed, 1 mL 75% EtOH was added to the pellet (using DEPC water) and the sample was vortexed until the pellet was resuspended. The samples were centrifuged for 5 min at 7500 g at 4 °C and the supernatant was removed. The pellet was dried and dissolved in DEPC water. The RNA was precipitated by adding 200 µL 5M LiCl solution and incubated for 1.5 h at –20 °C. After incubation, the solution was centrifuged for 20 min at 14,000 g at 4 °C. The supernatant was removed, the pellet washed with 500 µL 75% EtOH and then centrifuged for 10 min at 14,000 g at 4 °C. The pellet was again dried and dissolved in DEPC water.

### *Mitochondrial tRNA WANCY cluster amplification:*

For verifying the gene order arrangement, independently of the *in silico* mitogenome DNA assembly algorithms, we performed amplification tests to assess the length variation of the WANCY region from different species. We first extracted total DNA from new individuals of the analyzed species using a standard ammonium acetate precipitation method [S1] (adapted by [S2]). Then, we designed two new primers flanking the WANCY region based on the sequences obtained from mitogenomes, one at the 3' region of the ND2 gene (ND2\_F2L\_Brachy: 5'-ACCYTRGCCCCAAAY-TCAAC-3') and one at the 5' region of the COI gene (COI\_RH\_Brachy: 5'-ARATTATYACGAAGGCGTG-3'). Finally, we PCR amplified the specimens using the following protocol: The amplification reactions were carried out in a 20-µL reaction, using the Ampliqon Taq DNA Polymerase Master Mix, 0.5 µL of each primer (10 µM) and 1 µL of extracted DNA. The thermal cycling conditions were: 3 min at 95 °C, 40 cycles of 20 s at 95 °C, 20 s at 50 °C, and 1 min 20 s at 68 °C, and a final extension of 3 min at 68 °C.

The fragments were separated by electrophoresis in 1.5 % agarose gel, stained with GelRed (Bioyium inc.). The size of the fragments was estimated by comparison with the molecular size standard DNA Ladder GeneRuler 1 Kb (Thermo Scientific).

### *Mitochondrial phylogenetic inference for the genus *Brachycephalus**

To infer the mitochondrial phylogenetic relationship between species of the genus *Brachycephalus*, we used two optimality criteria: Bayesian inference (BI) and maximum likelihood (ML). For both analyses we gathered mitochondrial sequences (fragments of the 12S rRNA gene, 16S rRNA gene and Cytochrome B) from GenBank for one or two individuals per species available (Table S4) and extracted only these genes from the mitogenomes available. We only used the mitochondrial sequences to avoid many missing data on data matrix. Final matrix contained 47 individuals and 3850 base-pairs.

Genes were aligned using MAFFT v7.130b [S3] and concatenated using SequenceMatrix [S4]. We computed BI analysis in MrBayes 3.2.6 [S5] using two independent runs of  $10 \times 10^6$  generations, starting with random trees and eight Markov chains (one cold), sampled every 1000 generations. We performed the run using GTR+ $\Gamma$  model. We used the standard deviation of split frequencies ( $<0.01$ ) and Estimated Sample Size (ESS  $> 200$ ) to assess run convergence. We discarded 25% of generations and trees as burnin and obtained the 50% majority rule consensus tree. We computed ML analysis in RAxML v.8.2.10 [50], using GTR+ $\Gamma$  model, searching the most likely tree 1000 times and conducting 1000 non-parametric bootstrap replicates. We used *Ischnocnema henselii* as the root for all analyses, and we drew the trees using FigTree 1.4.2 [S6]. We performed all phylogenetic analyses using the CIPRES Science gateway portal [S7].

### Supplementary Materials References

- S1. Maniatis, T.; Fritsch, E.F.; Sambrook, J. *Molecular Cloning: A Laboratory Manual*. Cold Spring Harbor Laboratory Press, New York, 1982.
- S2. Lyra, M.L.; Haddad, C.F.B.; de Azeredo-Spin, M.L. Toward defining the course of evolution: minimum change for a specific tree topology. *Mol. Ecol.* **2017**, *17*, 966–980, doi: 10.1111/1755-0998.12648.
- S3. Katoh, K.; Standley, D.M. MAFFT multiple sequence alignment software version 7: improvements in performance and usability. *Mol. Biol. Evol.* **2013**, *30*, 772–780, doi:10.1093/molbev/mst010.
- S4. Vaidya, G.; Lohman, D.J.; Meier, R. SequenceMatrix: concatenation software for the fast assembly of multigene datasets with character set and codon information. *Cladistics* **2011**, *27*, 171–180.
- S5. Ronquist F.; Teslenko, M.; Van Der Mark, P.; Ayres, D.L.; Darling, A.; Hohna, S.; Larget, B.; Liu, L.; Suchard, M.A.; Huelsenbeck, J.P. Mrbayes 3.2: efficient Bayesian phylogenetic inference and model choice across a large model space. *Syst. Biol.* **2012**, *61*, 539–542, doi: 10.1093/sysbio/sys029.
- S6. Rambaut, A.; Suchard, M.A.; Xie, D.; Drummond, A.J. Tracer v1.6. **2014**. University of Edinburgh, UK.
- S7. Miller, M.A.; Pfeiffer, W.; Schwartz, T. Creating the CIPRES Science Gateway for inference of large phylogenetic trees. *Proc. Gatew. Comput. Environ. Workshop*, 2010, 1–8, doi: 10.1109/GCE.2010.5676129.

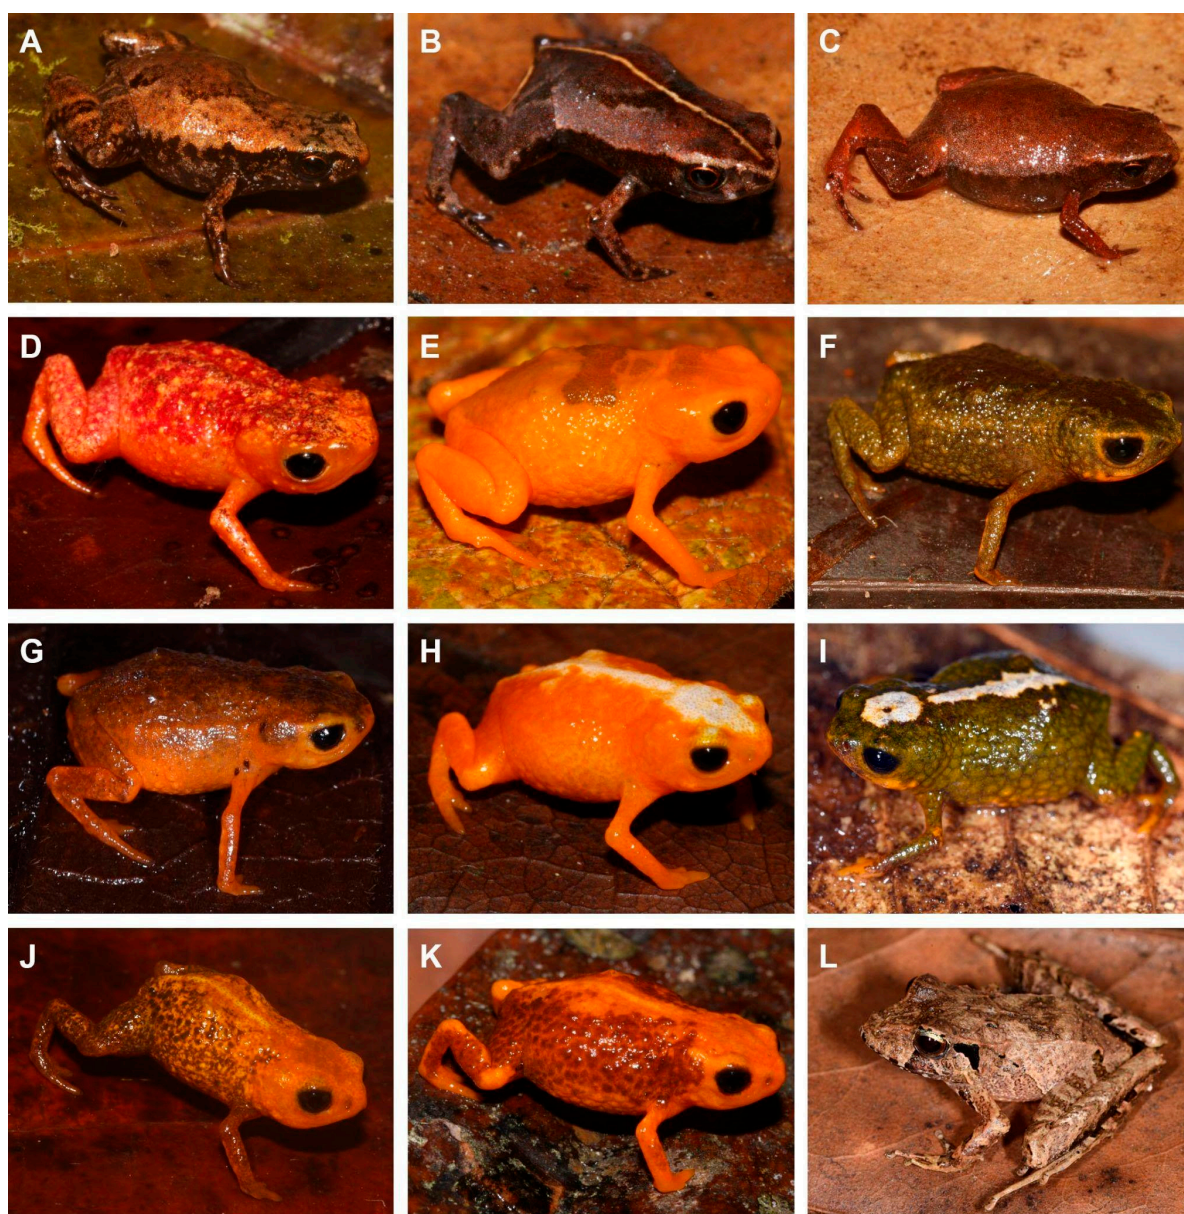

**Figure S1.** Species sampled for this study as representatives of the main clades within *Brachycephalus* (A–K) and species used as outgroup taxon, *Ischnocnema henselii* (L). The flea-toads with leptodactyliform body plan: (A) *B. hermogenesi*; (B) *B. pulex*; and (C) *B. sulfuratus*. The pumpkin-toadlets with bufoniform body plan of the *B. ephippium* group (D–E) and of the *B. pernix* group (F–K): (D) *B. pitanga*; (E) *B. rotenbergae*; (F–H) *B. actaeus*, morphotypes green, brownish, and orange, respectively; (I) *B. albolineatus*; (J) *B. auroguttatus*; and (K) *B. quiririensis*. Credits for the photos: Condez, TH (A–C, E, F, H, J, and K); Monteiro, JPC (D); and Vences, M (G, I, and L).

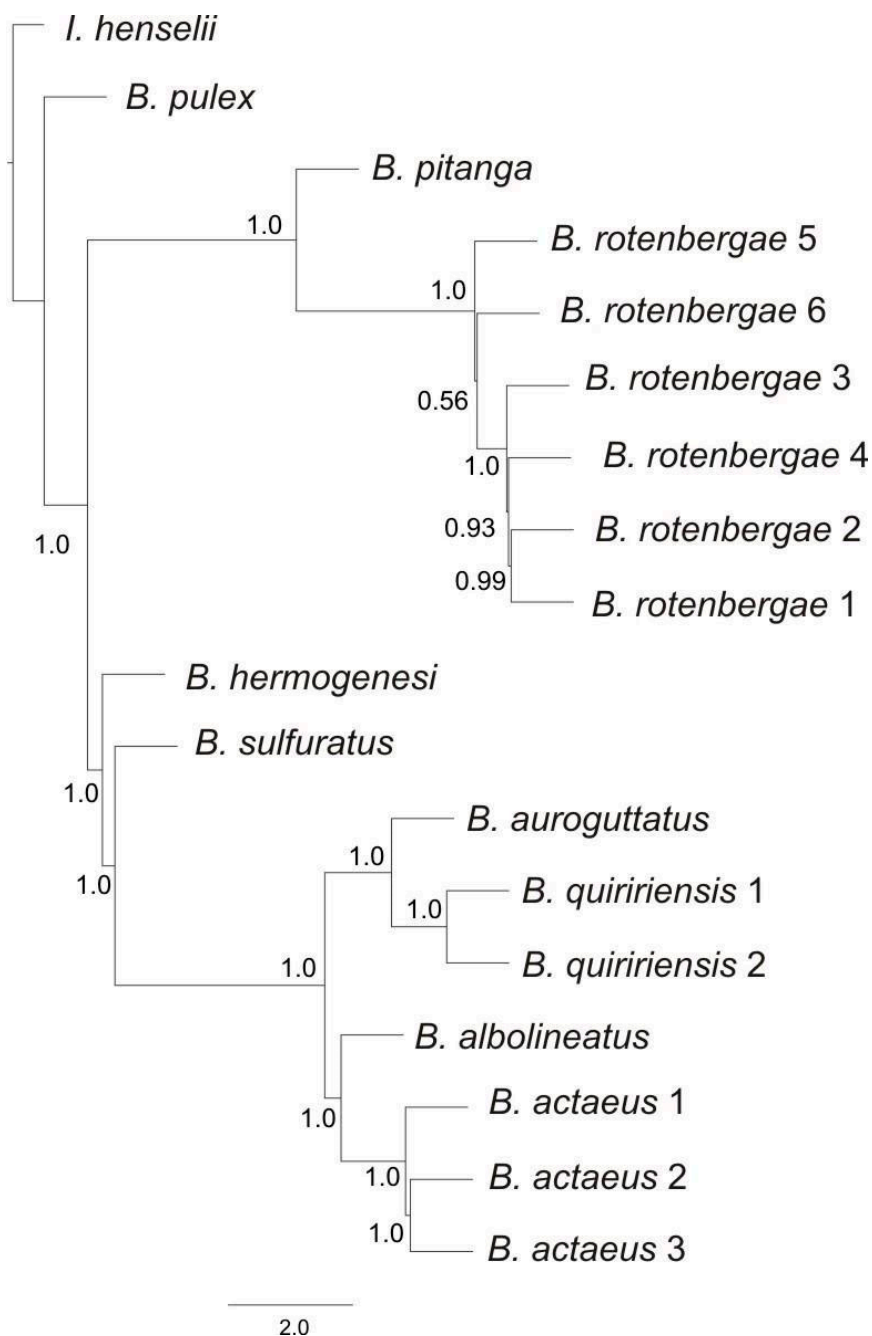

**Figure S2.** Species tree obtained using ASTRAL from 5296 gene trees of nuclear-encoded protein-coding markers derived from transcriptomes. Numbers at nodes show local posterior probabilities.

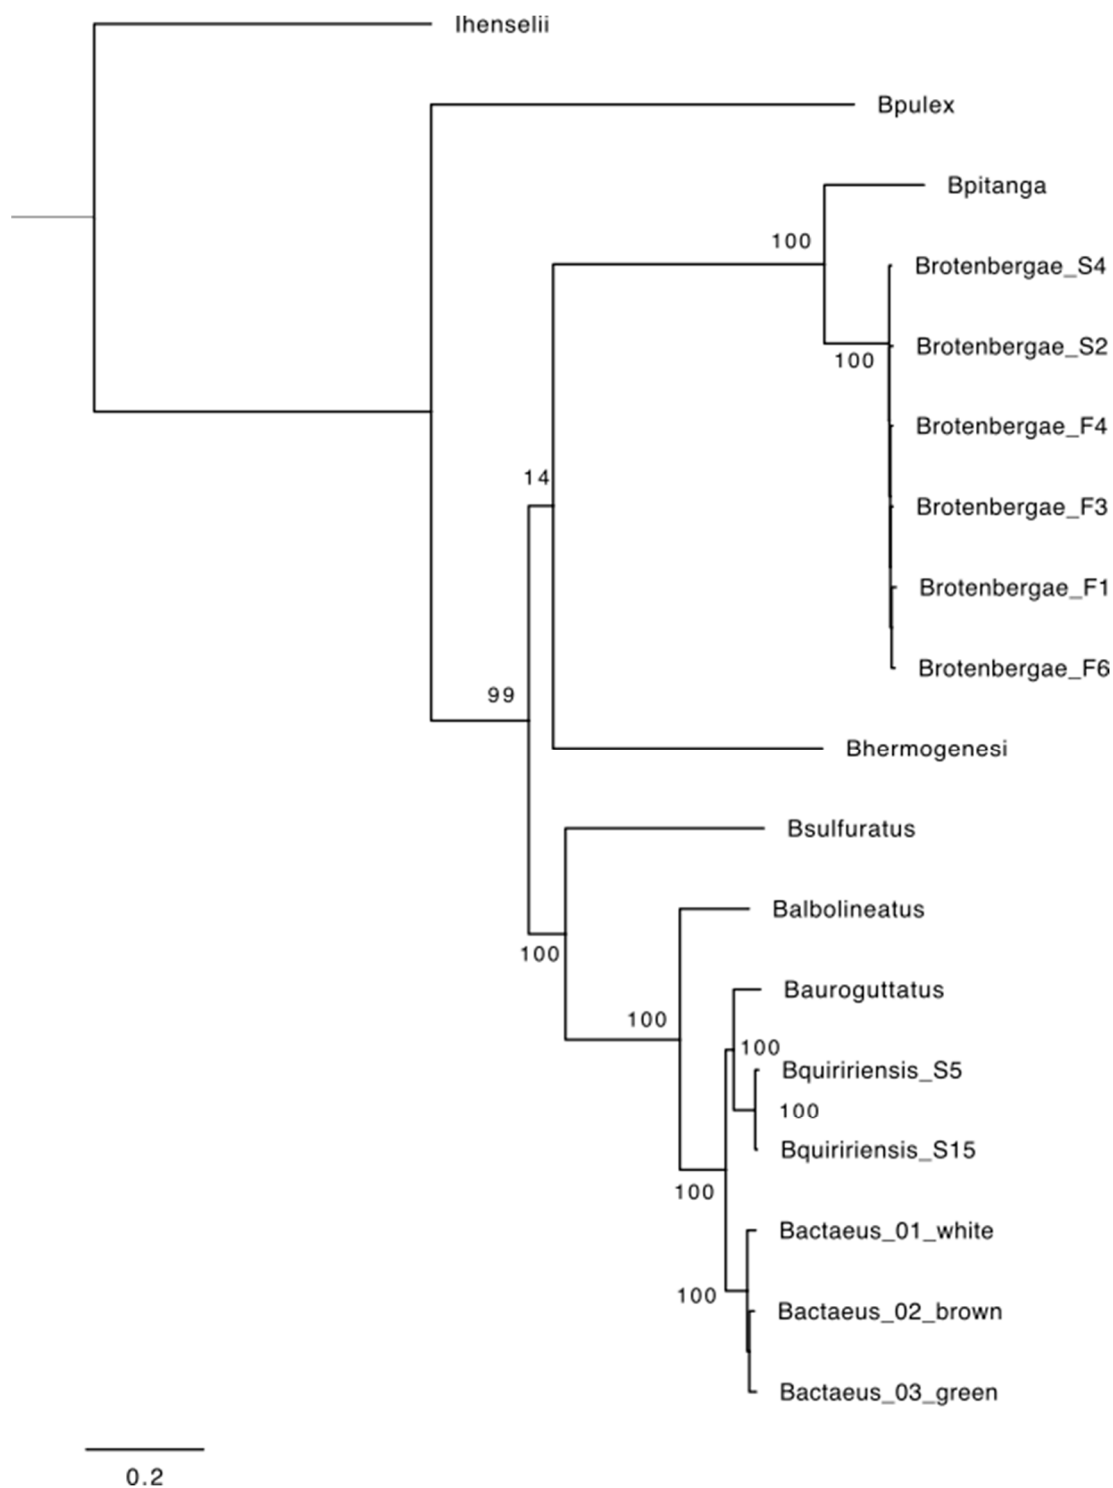

**Figure S3.** Maximum Likelihood tree calculated from a concatenated alignment of 13,938 nucleotide positions of the two rRNA genes and the 13 protein coding genes from full mitochondrial genomes. The tree represents a detailed version of Fig. 3A in the main paper, and is here shown to give full information on outgroup and node support values, as non-parametric bootstrap support shown at each node.



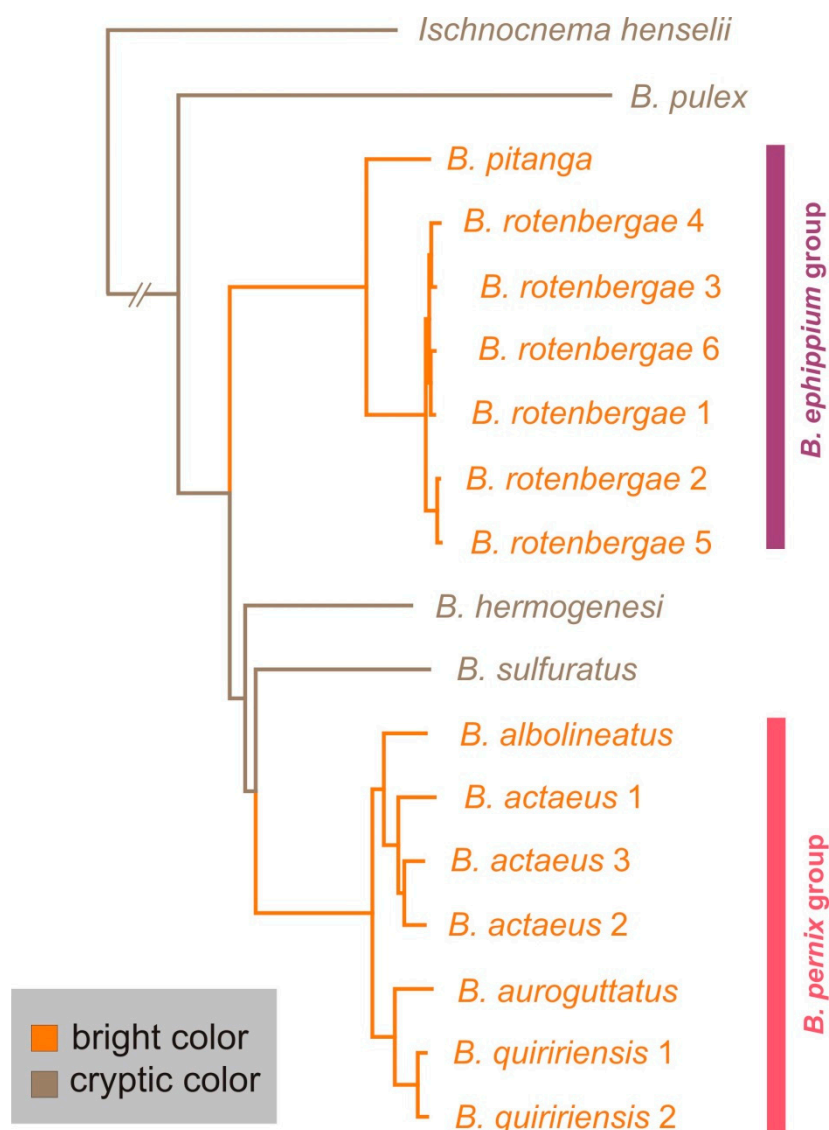

**Figure S4.** *Brachycephalus* phenotype reconstructed under a parsimony approach using TNT (Fitch optimization). Identical reconstructions were obtained for color (shown), and for bufoniform vs. leptodactyliform morphology. The character state “bright color” defines species that have at least some part of the body surface colored bright orange (dorsum, hands and feet, or ventral surface).

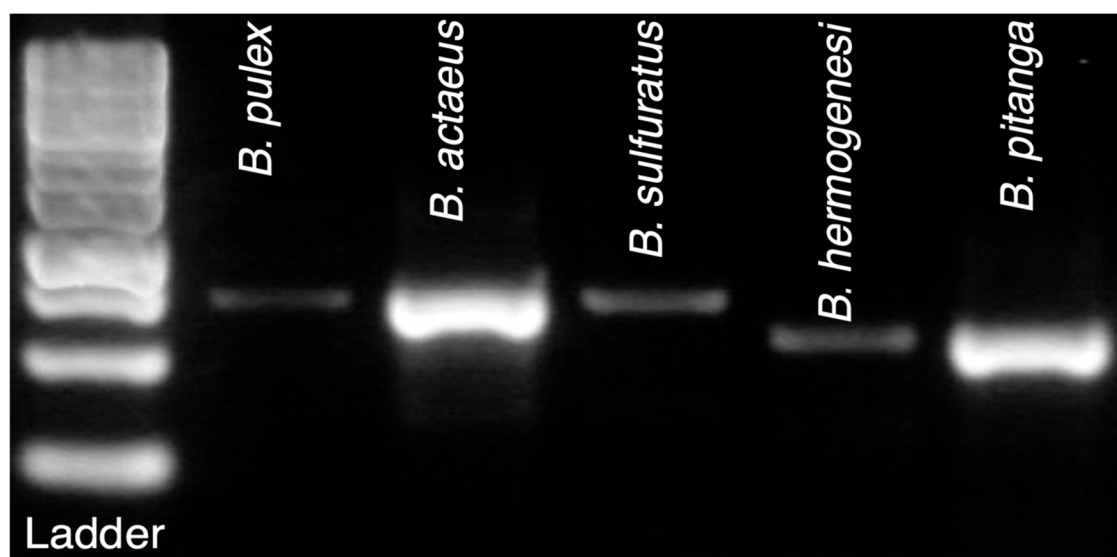

**Figure S5.** Electrophoresis 1.5% agarose gel showing different length fragment for the tRNA WANCY cluster region of different *Brachycephalus* species. Both *B. hermogenesi* and *B. pitanga* [resented smaller fragments as expected based on the tRNAs translocations.

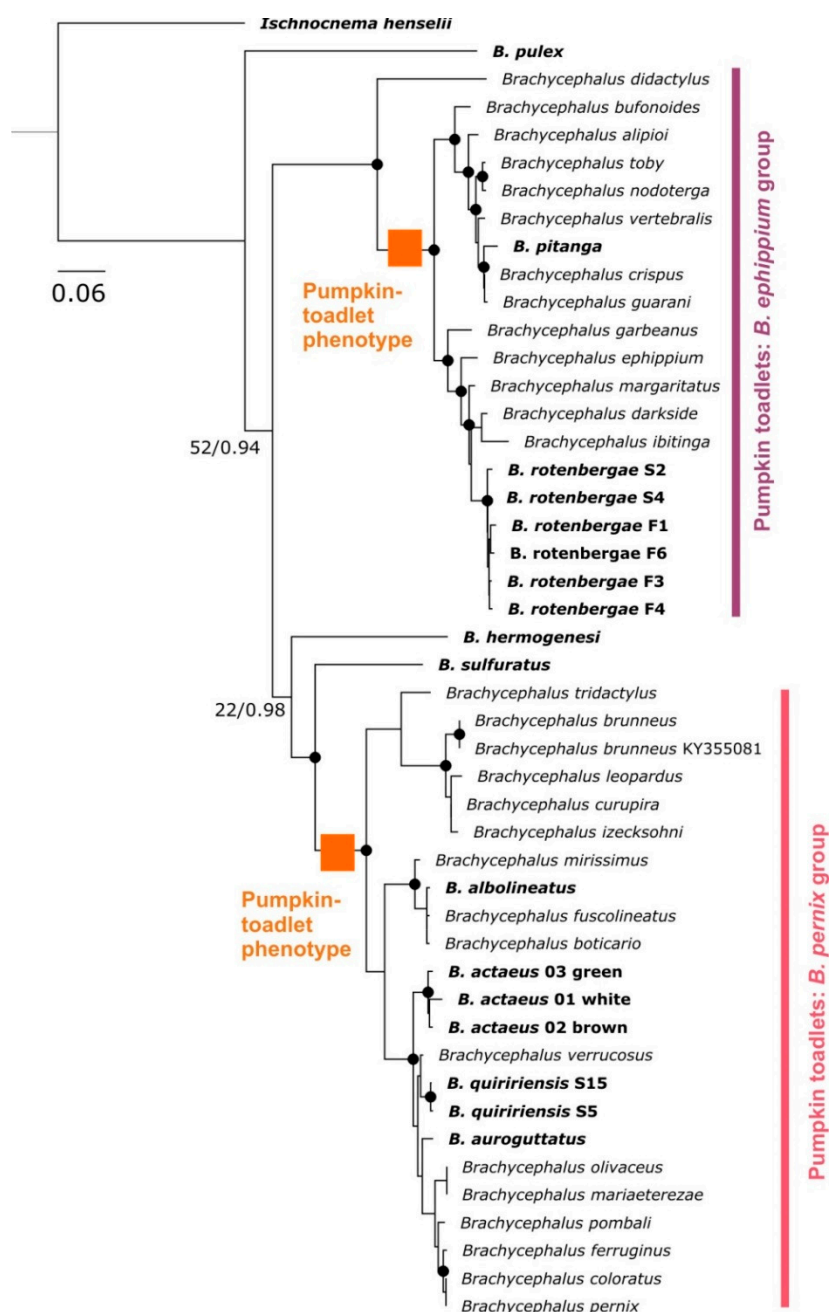

**Figure S6.** Maximum Likelihood phylogenetic inference for *Brachycephalus* species including mitogenomes obtained here and sequence data from GenBank (see Table S3 for additional accession numbers). Maximum likelihood non-parametric bootstrap support (BS) and posterior probabilities (PP) are shown near the branches for deep nodes (to the left and to the right of the bar, respectively). Black dots indicate fully supported clades (BS=100%, PP=1.0) and support values are not shown for nodes with low support (BS < 0.9; PP < 0.95) within each pumpkin-toadlet clade are not shown. Taxa in bold are those with complete mitogenomes obtained in the present study. Colored squares mark the two clades of pumpkin toadlet phenotype but do not symbolize evolutionary transitions. **Table S1.** List of samples used in the present analysis, their geographic provenance, sample/voucher number, body plan characteristic, mitogenome accession number and amount of reads analysed. Note that for most specimens, the full sample was used for DNA/RNA extraction and no separate voucher specimen was preserved. mtDNA reads: total number of reads recovered with MITObim; Total reads: Total of interleaved and non-duplicated RNAseq reads obtained for each specie.

**Table S1.** List of samples used in the present analysis, their geographic provenance, sample/voucher number, body plan characteristic, mitogenome accession number and amount of reads analysed. Note that for most specimens, the full sample was used for DNA/RNA extraction and no separate voucher specimen was preserved. mtDNA reads: total number of reads recovered with MITObim; Total reads: Total of interleaved and non-duplicated RNAseq reads obtained for each specie.

| Species                                                                                                                                                                                                                                                                                                                                                                                                               |                                                 |                         |            |            |                       |                  |                |             |             |
|-----------------------------------------------------------------------------------------------------------------------------------------------------------------------------------------------------------------------------------------------------------------------------------------------------------------------------------------------------------------------------------------------------------------------|-------------------------------------------------|-------------------------|------------|------------|-----------------------|------------------|----------------|-------------|-------------|
|  <p><b>Copyright:</b> © 2021 by the authors. Licensee MDPI, Basel, Switzerland. This article is an open access article distributed under the terms and conditions of the Creative Commons Attribution (CC BY) license (<a href="https://creativecommons.org/licenses/by/4.0/">https://creativecommons.org/licenses/by/4.0/</a>).</p> |                                                 |                         |            |            |                       |                  |                |             |             |
|                                                                                                                                                                                                                                                                                                                                                                                                                       | Locality                                        | Sample ID               | Latitude   | Longitude  | Name in trees         | Body plan        | mtDNA acc. No. | mtDNA reads | Total reads |
| <i>Ischnocnema henselii</i>                                                                                                                                                                                                                                                                                                                                                                                           | Morro Boa Vista, Jaraguá do Sul, SC             | Feb2017-RNA-A-FeedExp-C | -26.51611° | -49.05389° | <i>I. henselii</i>    | --               | MZ770752       | 426708      | 25247956    |
| <i>Brachycephalus pulex</i>                                                                                                                                                                                                                                                                                                                                                                                           | PN Serra das Lontras, Arataca, BA               | MVTIS 3204              | -15.16198  | -39.34381  | <i>B. pulex</i>       | leptodactyliform | MZ770742       | 266248      | 17702335    |
| <i>Brachycephalus hermogenesi</i>                                                                                                                                                                                                                                                                                                                                                                                     | PESM Santa Virginia, São Luiz do Paraitinga, SP | MVTIS 3210              | -23.33867° | -45.14815° | <i>B. hermogenesi</i> | leptodactyliform | MZ770740       | 618797      | 38589735    |
| <i>Brachycephalus sulfuratus</i>                                                                                                                                                                                                                                                                                                                                                                                      | Casarão Backmeyer, São Francisco do Sul, SC     | Feb2017-RNA44           | -26.17528° | -48.71222° | <i>B. sulfuratus</i>  | leptodactyliform | MZ770751       | 322432      | 12120096    |



|                                    |                                                       |                                |            |            |                          |            |          |         |          |
|------------------------------------|-------------------------------------------------------|--------------------------------|------------|------------|--------------------------|------------|----------|---------|----------|
| <i>Brachycephalus actaeus</i>      | Morro do Cantagalo,<br>São Francisco do Sul, SC       | MVTIS 3206 white strip         | -26.18928° | -48.73229° | <i>B. actaeus</i> 1      | bufoniform | MZ770735 | 447693  | 46194049 |
| <i>Brachycephalus actaeus</i>      | Estrada do Saí, São<br>Francisco do Sul, SC           | Feb2017-RNA56-green            | -26.20167° | -48.69361° | <i>B. actaeus</i> 2      | bufoniform | MZ770737 | 341395  | 17444017 |
| <i>Brachycephalus actaeus</i>      | Casarão Backmeyer,<br>São Francisco do Sul,<br>SC     | Feb2017-RNA58-<br>orange/brown | -26.17528° | -48.71222  | <i>B. actaeus</i> 3      | bufoniform | MZ770736 | 315185  | 14296301 |
| <i>Brachycephalus albolineatus</i> | Morro Boa Vista,<br>Jaraguá do Sul, SC                | Feb2017-RNA02                  | -26.51611° | -49.05389° | <i>B. albolineatus</i>   | bufoniform | MZ770738 | 306481  | 13310687 |
| <i>Brachycephalus auroguttatus</i> | Pedra da Tartaruga,<br>Garuva, SC                     | MVTIS 3207                     | -26.00583° | -48.92361° | <i>B. auroguttatus</i>   | bufoniform | MZ770739 | 395248  | 31667155 |
| <i>Brachycephalus quiririensis</i> | Campos do Quiriri,<br>Garuva, SC                      | Feb2017-RNA-D<br>FeedExp       | -26.02556° | -48.97333° | <i>B. quiririensis</i> 1 | bufoniform | MZ770743 | 377825  | 30154214 |
| <i>Brachycephalus quiririensis</i> | Campos do Quiriri,<br>Garuva, SC                      | Feb2017-RNA-C<br>FeedExp       | -26.02556° | -48.97333° | <i>B. quiririensis</i> 2 | bufoniform | MZ770744 | 221775  | 18034035 |
| <i>Brachycephalus pitanga</i>      | PESM Santa Virginia,<br>São Luiz do<br>Paraitinga, SP | MVTIS 3205                     | -23.33°    | -45.14°    | <i>B. pitanga</i>        | bufoniform | MZ770741 | 1132042 | 38736692 |
| <i>Brachycephalus rotenbergae</i>  | Mogi das Cruzes, SP,<br>Brazil                        | MVTIS 3213                     | -23.49°    | -46.19°    | <i>B. rotenbergae</i> 1  | bufoniform | MZ770745 | 1244504 | 24982826 |
| <i>Brachycephalus rotenbergae</i>  | Mogi das Cruzes, SP,<br>Brazil                        | Brachy2 Ftcontrol              | -23.49°    | -46.19°    | <i>B. rotenbergae</i> 2  | bufoniform | MZ770749 | 711077  | 15084723 |
| <i>Brachycephalus rotenbergae</i>  | Mogi das Cruzes, SP,<br>Brazil                        | MVTIS 3214                     | -23.49°    | -46.19°    | <i>B. rotenbergae</i> 3  | bufoniform | MZ770746 | 1141170 | 21059190 |
| <i>Brachycephalus rotenbergae</i>  | Mogi das Cruzes, SP,<br>Brazil                        | MVTIS 3215                     | -23.49°    | -46.19°    | <i>B. rotenbergae</i> 4  | bufoniform | MZ770747 | 818811  | 33299329 |

---

|                                   |                                |                     |         |         |                         |            |          |         |          |
|-----------------------------------|--------------------------------|---------------------|---------|---------|-------------------------|------------|----------|---------|----------|
| <i>Brachycephalus rotenbergae</i> | Mogi das Cruzes, SP,<br>Brazil | Brachy3 FT-infected | -23.49° | -46.19° | <i>B. rotenbergae</i> 5 | bufoniform | MZ770750 | 904389  | 13876164 |
| <i>Brachycephalus rotenbergae</i> | Mogi das Cruzes, SP,<br>Brazil | MVTIS 3216          | -23.49° | -46.19° | <i>B. rotenbergae</i> 6 | bufoniform | MZ770748 | 1111026 | 21930389 |

---

**Table S2.** Best partition scheme selected with PartitionFinder2 for mitogenome tree analyses.

| Subset | Best Model | # sites | Partition                                                                         |
|--------|------------|---------|-----------------------------------------------------------------------------------|
| 1      | GTR+G      | 977     | 12S                                                                               |
| 2      | GTR+G      | 1664    | 16S                                                                               |
| 3      | GTR+I+G    | 1127    | COIII_codon_pos1, ND4_codon_pos1, ND1_codon_pos1, ND4L_codon_pos1                 |
| 4      | GTR+G      | 1627    | COIII_codon_pos2, ND5_codon_pos2, ND4_codon_pos2, ND1_codon_pos2                  |
| 5      | GTR+I+G    | 864     | ND1_codon_pos3, ND4_codon_pos3, ND4L_codon_pos3                                   |
| 6      | GTR+G      | 575     | ATP6_codon_pos1, ND2_codon_pos1                                                   |
| 7      | GTR+G      | 1171    | CytB_codon_pos2, ND4L_codon_pos2, ND2_codon_pos2, ATP6_codon_pos2, ND3_codon_pos2 |
| 8      | GTR+I+G    | 399     | ND2_codon_pos3, ATP8_codon_pos3                                                   |
| 9      | GTR+G      | 513     | COI_codon_pos1                                                                    |
| 10     | GTR+I+G    | 513     | COI_codon_pos2                                                                    |
| 11     | GTR+I+G    | 512     | COI_codon_pos3                                                                    |
| 12     | GTR+I+G    | 781     | COII_codon_pos1, CytB_codon_pos1, ND3_codon_pos1, ATP8_codon_pos2                 |
| 13     | GTR+G      | 229     | COII_codon_pos2                                                                   |
| 14     | GTR+I+G    | 829     | COII_codon_pos3, ND5_codon_pos3                                                   |
| 15     | GTR+I+G    | 55      | ATP8_codon_pos1                                                                   |
| 16     | GTR+I+G    | 345     | ATP6_codon_pos3, ND3_codon_pos3                                                   |
| 17     | GTR+I+G    | 643     | COIII_codon_pos3, CytB_codon_pos3                                                 |
| 18     | GTR+G      | 601     | ND5_codon_pos1                                                                    |
| 19     | GTR+G      | 171     | ND6_codon_pos1                                                                    |
| 20     | GTR+G      | 171     | ND6_codon_pos2                                                                    |
| 21     | GTR+I+G    | 171     | ND6_codon_pos3                                                                    |

**Table S3.** GenBank accession number for sequences included in the *Brachycephalus* spp. tree analyses. \* mitogenome available: for this specimen we also included all other coding genes in the Maximum likelihood phylogenetic inference analyses.

| Terminal name                       | Body plan         | Voucher         | 12S rRNA   | 16S rRNA   | CytB       |
|-------------------------------------|-------------------|-----------------|------------|------------|------------|
| <i>Brachycephalus didactylus</i>    | leptodactyliiform | MNRJ68818       | MK697418.1 | MK697363.1 | MK697465.1 |
| <i>Brachycephalus alipioi</i>       | bufoniform        | CFBH11759       | MK697414.1 | MK697360.1 | MK697462.1 |
| <i>Brachycephalus boticario</i>     | bufoniform        | Bboticario1     |            | KX025370.1 |            |
| <i>Brachycephalus brunneus</i>      | bufoniform        |                 | HQ435677.1 | HQ435691.1 | HQ435704.1 |
| <i>Brachycephalus brunneus*</i>     | bufoniform        | mitogenome      | KY355081   | KY355081   | KY355081   |
| <i>Brachycephalus bufonoides</i>    | bufoniform        | ZUFRJ15424      |            | MH259790   |            |
| <i>Brachycephalus coloratus</i>     | bufoniform        | ind1            |            | MT928335.1 |            |
| <i>Brachycephalus crispus</i>       | bufoniform        | CFBH27859       | MK697415.1 | MK697361.1 | MK697463.1 |
| <i>Brachycephalus curupira</i>      | bufoniform        | BSalto3         |            | KX025380.1 |            |
| <i>Brachycephalus darkside</i>      | bufoniform        | PPGT600         |            | MT734440.1 |            |
| <i>Brachycephalus ephippium</i>     | bufoniform        | CFBH12355       | MK697421.1 | MK697367.1 | MK697467.1 |
| <i>Brachycephalus ferruginus</i>    | bufoniform        |                 | HQ435681.1 | HQ435695.1 | HQ435708.1 |
| <i>Brachycephalus fuscolineatus</i> | bufoniform        | Bfuscolineatus5 |            | KX025340.1 |            |
| <i>Brachycephalus garbeanus</i>     | bufoniform        | CFBH12688       | MK697424.1 | MK697370.1 | MK697470.1 |
| <i>Brachycephalus guarani</i>       | bufoniform        | CFBH12997       | MK697425.1 | MK697371.1 | MK697471.1 |
| <i>Brachycephalus ibitinga</i>      | bufoniform        | CFBH44449       |            | MT734431.1 |            |
| <i>Brachycephalus izecksohni</i>    | bufoniform        |                 | HQ435683.1 | HQ435696.1 | HQ435710.1 |
| <i>Brachycephalus leopardus</i>     | bufoniform        | Bleopardus1     |            | KX025239.1 |            |
| <i>Brachycephalus margaritatus</i>  | bufoniform        | CFBH2420        | MK697427.1 | MK697377.1 | MK697475.1 |
| <i>Brachycephalus mariaterrezae</i> | bufoniform        | Bmariaterrezae1 |            | KX025316.1 |            |
| <i>Brachycephalus mirissimus</i>    | bufoniform        |                 |            | MH136570.1 |            |
| <i>Brachycephalus nodoterga</i>     | bufoniform        | CFBH34912       | MK697429.1 | MK697379.1 | MK697477.1 |
| <i>Brachycephalus olivaceus</i>     | bufoniform        | CFBH40440       | MK697432   | MG889435.1 |            |
| <i>Brachycephalus pernix</i>        | bufoniform        |                 | HQ435685.1 | HQ435698.1 | HQ435712.1 |
| <i>Brachycephalus pombali</i>       | bufoniform        |                 | HQ435687.1 | HQ435700.1 | HQ435714.1 |
| <i>Brachycephalus toby</i>          | bufoniform        | CFBH44397       | MK697436.1 | MK697387.1 | MK697484.1 |
| <i>Brachycephalus tridactylus</i>   | bufoniform        | TRID-1          |            | MG889431.1 |            |
| <i>Brachycephalus verrucosus</i>    | bufoniform        | Bverrucosus9    |            | KX025234.1 |            |
| <i>Brachycephalus vertebralis</i>   | bufoniform        | CFBH1389        | MK697442.1 | MK697393.1 | MK697490.1 |
